# Supplementary material for: Antagonist actions of CMK-1/CaMKI and TAX-6/Calcineurin along the C. elegans thermal avoidance circuit orchestrate adaptation of nociceptive response to repeated stimuli
Source: bioRxiv preprint, doi:10.1101/2024.09.18.613419, version 2 (2025-02-10)
Supplement: File S1 [file 613419_file03.xlsx]

## Sheet: PhosphoSites on peptide
Protein	Protein names	Gene names	Amino acid	Sequence window
H2FLH3	Twitchin	unc-22;unc-22;unc-22	S	SIDMRRESVQEILEK
A0A061AD09		ard-1	S	AQLIPNPSRLGHPHE
C1P641	Laminin-like protein epi-1	epi-1;epi-1;epi-1;epi-1	S	GAHFEKGSSLDLNIP
C1P641	Laminin-like protein epi-1	epi-1;epi-1;epi-1;epi-1	S	LNLNQQISRLFVGGV
A0A061AIX6		lsm-3	S	MLFVRGDSVILVSPP
A0A061AL89	Ankyrin repeat and KH domain-containing protein R11A8.7	R11A8.7	S	LRQQERDSALTLSAQ
D3KFW7		kin-4;kin-4;kin-4;kin-4;kin-4;kin-4;kin-4	S	GFSAAAQSAQDLLNR
A0A0K3AWK1		pgp-2	S	RALVRSPSVLLLDEA
A0A0K3ARI2			S	NRFLSLGSSIGTLRI
A0A0K3ARI2			S	RFLSLGSSIGTLRIP
A0A0K3AV29			S	ADLRRQLSLEPLELN
A0A0K3AXK2		egl-8	S	QPARRRNSSIAWIQT
A0A0K3ARY0		feh-1	S	LMLHRRPSSLHAIES
A0A0K3ASN4		fln-2;fln-2;fln-2	S	QSPHRDWSASTVYDR
A0A0K3ASN4		fln-2;fln-2	S	PSPPRGVSNTSFGSV
A0A0K3ASN4		fln-2;fln-2;fln-2	S	QEMERTMSYYSELSG
Q18408		imp-3	S	REISRRASVSLGDEQ
Q18408		imp-3	S	ISRRASVSLGDEQAE
Q18408		imp-3	S	QRIRRLLSDIEEADI
A0A0S4XR45		ulp-2	S	VYLTSQLSEMTPREW
A0A163VTS9	Dynein heavy chain, cytoplasmic	dhc-1	S	ANLLRSLSSIPPQRL
Q95Y95			S	PPPARRTSQITAATP
H2KYC5		ajm-1;ajm-1;ajm-1	S	TVVDRRLSNISLLSP
S5ZDJ9		let-711	S	SFLFNNLSQSNLIQK
S5ZDJ9		let-711	S	PLTQRQNSNSGWHAA
S5ZDJ9		let-711	S	TQRQNSNSGWHAAPA
A0A1I6CMC9			S	SGDDRARSSNNMATF
A0A1I6CMC9			S	GDDRARSSNNMATFN
A0A1N7SYP7	Eukaryotic translation initiation factor 3 subunit L	eif-3.L	S	PLLRQTQSFLEGIES
H9G352	Basement membrane proteoglycan	unc-52;unc-52;unc-52;unc-52;unc-52;unc-52;unc-52;unc-52;unc-52	S	LPAHARFSQGNLEIP
A3QMC5		rpl-34	S	VTYRRRLSYNTTSNK
X5LQ14			S	QLLISQPSFDLRRTQ
K8ESK7			S	RLYVTRTSSVPDLTA
K8ESK7			S	LYVTRTSSVPDLTAH
Q17948		pptr-2;pptr-2;pptr-2;pptr-2	S	PRRERRQSSSMFNIS
Q17948		pptr-2;pptr-2;pptr-2;pptr-2	S	RRERRQSSSMFNISQ
Q17948		pptr-2;pptr-2;pptr-2;pptr-2	S	RERRQSSSMFNISQN
H2KZ75			S	LECHRQLSFNQDHSQ
H2KZ75			S	SVRSRRPSVAEILLD
B3WFY2			S	STLRRRRSFTGFVLE
B7FAS0		mcd-1	S	LQQGQQQSRLQMLRE
V6CJH3		kcc-2;kcc-2;kcc-2;kcc-2	S	__MLRKLSVYNATEA
C6KRG1			S	KLSIPDRSRSVSPMP
C6KRG1			S	SIPDRSRSVSPMPAE
C9IY22			S	YTPVREISAVNNVND
C9IY22			S	YRFNRSRSVDLSSIS
D0PV95		laf-1	S	LSPTRELSLQIFNES
D0PV95		laf-1	S	GNVGLATSFFNDKNR
Q20184		ech-2;ech-2	S	RELYQGNSVVRFILN
D3YT96	Probable glutamine--tRNA ligase	qars-1;qars-1;ers-1	S	AKLGLTMSQMVIDPH
D5MCN2		larp-1	S	LEDAEIGSRYGIEAL
D5MCQ9		sup-26;sup-26;sup-26;sup-26;sup-26;sup-26	S	SNFNTTPSSTNLYIR
D9N122		ehs-1;ehs-1	S	MMGSRAGSVTSLDDV
G5EG85		unc-70;unc-70;unc-70	S	MKLQRRLSMMERDLG
Q23542		dnc-1;dnc-1	S	SRMVREFSNLSQSSV
E7FM69			S	PRLLQMLSSVTSRES
G4S034		spc-1;spc-1	S	GEFQRSLSSAEEDFR
G5EBE3		cir-1	S	SPLRRRQSSPMVASP
G5EBH3		sma-1;sma-1;sma-1;sma-1	S	SALERLRSEWALRNG
G5EES2		erm-1;erm-1	S	VRVTSMDSELEFAIQ
G5EBY3		nmy-2	S	DLVHRAQSVDQVNFS
G5EBY3		nmy-2	S	EQLARLMSTLNNTNP
G5EC67		2O16	S	PHWSRFMSLEQLYGL
G5EC75		clh-6	S	SGLERVMSNSNLEHV
G5ECC0		klp-16	S	PPPSTQRSTATFSLK
Q86S80		rme-1;rme-1;rme-1;rme-1;rme-1;rme-1	S	KKQFRALSGFGNAFL
G5ECD0		cyp-35c1	S	AEVQRHASILNINFW
G5ECD0		cyp-35c1	S	WQELRRFSMLTMRNM
G5EGL7		bmk-1;bmk-1	S	TSFVRRDSLLETTNN
G5EFK7		vab-10;vab-10;vab-10;vab-10;vab-10	S	LNLVRAVSSGIIDPV
G5EEN1		fars-2;fars-2	S	DRRILQESSNPLNLL
G5ECR7		elb-1	S	______MSQQELFFE
G5ECY0		dlg-1	S	NAIRRLQSNANIQPI
G5ECY0		dlg-1	S	SKVYSIISRESQTPI
O62178		rme-8;rme-8	S	KEIRRLASDNIGIIV
G5ED41	Cullin-associated NEDD8-dissociated protein 1	cand-1	S	MISSHRESLLNLSQK
G5ED41	Cullin-associated NEDD8-dissociated protein 1	cand-1	S	STNYLSRSQLAIIQS
Q8I4D9		unc-25;unc-25;unc-25	S	AGIERANSVTWNPHK
G5EDE8		ile-1	S	NLAQRDGSIPFWIVS
G5EDN8		vab-19	S	PTFRRAPSQGDLPRG
G5EDQ0		clh-1;clh-1	S	RRRSRTASEIFSTIN
G5EGD0			S	ASVARRISVDELTKP
G5EE72		mrp-5	S	VKLRRGISAIAQDPS
G5EEF4			S	PAFRRQASTAGVNPV
G5EEH6		ivd-1	S	MYTTLNASRSYLYMV
G5EEX7			S	KTIARQASNILGDEE
G5EF05			S	FVVDRRVSLLEQEGV
G5EFF8			S	REYRSSRSVEALSEF
G5EFP4		sym-1	S	APFLRMVSLSNNNIR
G5EFQ1		idi-1	S	LVLHRAFSVFSFTSD
G5EG50			S	LLVVRRDSIGNVELN
G5EG54		cpt-5	S	ARLLRYESLANLSLD
G5EGA3		lem-3	S	HAIRRSRSNSTATLQ
G8JY38	Vitellogenin-2;Vitellogenin-1	vit-2;vit-2;vit-1	S	RAVVNMISFNPIAPR
G8JY38	Vitellogenin-2;Vitellogenin-1	vit-2;vit-2;vit-1	S	VRIFRTTSTSQLKEI
G8JY38	Vitellogenin-2	vit-2;vit-2	S	QIERLGESAIVIELP
G8JY38	Vitellogenin-2	vit-2;vit-2	S	QLRNGLISELQFDKE
G8JY38	Vitellogenin-2;Vitellogenin-1	vit-2;vit-2;vit-1	S	TPLTTCYSLIAKDCS
U4PRC7	GTPase-activating protein pac-1	pac-1;pac-1	S	RNTPRQASFMAAMQR
H2FLG7			S	TKYLRRFSELNPLQA
H2KYB9		grld-1;grld-1	S	ITQRLSLSSQNLLFD
Q8MQE8			S	__MFRQLSELYISTL
H2KYJ5		mtch-1	S	LIAKLALSSLSLPLT
H2KYW6		esyt-2;esyt-2	S	YQMLRSDSQGSLNSH
H2KZ36			S	SLRDRIRSTSQLLNL
Q86NB3		pmt-1;pmt-1;pmt-1	S	LTSLPSNSTFFLYTP
H2KZG6		acdh-1	S	GEIYEGTSNIQLNTI
Q65ZJ1		toe-2;toe-2	S	HPLIRDASQWFQMAR
O02174		zfp-3;zfp-3;zfp-3	S	ILRGPAISNLNQRGT
H2KZL1			S	KIITSQHSFQILFNE
O76566		unc-96;unc-96	S	RSRLATSSSTTNMFN
O76566		unc-96;unc-96	S	SRLATSSSTTNMFNA
O76566		unc-96;unc-96	S	RSVVRSDSGLENEIP
H2KZR4		ifc-2	S	DQQLRSVSRVDMNDN
H2KZS3			S	REISRAPSRNTSFVS
H2KZS3			S	RAPSRNTSFVSFLDY
H2KZS3			S	PRMPTATSFSSWSPP
H2KZS3			S	GQLERSLSREVIQKD
H2KZS3			S	SNYYRYSSQAPAPLR
H2L034		pmp-5;pmp-5	S	DFELRIPSSSSFLFH
H2L0C6			S	IQMMRKASNPDLTAP
H2L0D1			S	RDLFEQLSQLNLKDG
H2L0I3		lfi-1;lfi-1	S	NDIGRLGSNVLGIRN
H2L0I3		lfi-1;lfi-1;lfi-1	S	LENERRNSSQLSDGW
H2L0N9			S	VGVVCARSSTSTGQL
H2L0N9			S	GVVCARSSTSTGQLS
H2L2C8		atn-1;atn-1;atn-1;atn-1	S	NSVPRRDSQLQAELK
Q21032	Isocitrate dehydrogenase [NADP];Isocitrate dehydrogenase [NADP]	idh-1;idh-1	S	PRLVNTWSKPIIIGR
H9G2W1	Aminopeptidase-like protein AC3.5	AC3.5	S	SMFTTQPSYSYLRHV
O76554	Acetylcholine receptor subunit alpha-type des-2	des-2;des-2	S	RATQRGNSGLALISD
I2HAF8	40S ribosomal protein S6;40S ribosomal protein S6	rps-6;rps-6;rps-6	S	AKIARRRSSASHHSE
Q19286	Intermediate filament protein ifb-2	ifb-2;ifb-2	S	AFVFRLPSHLVIQQH
N1NTN5			S	KGICRNSSTELFNIA
O01483			S	PLLSRLISNVGSENS
O01658	Bifunctional lysine-specific demethylase and histidyl-hydroxylase NO66	T28F2.4	S	VSTGRQWSFANLMEK
O01692	40S ribosomal protein S17	rps-17	S	DNYMPEISTVDPSQL
O01739	Putative D-amino-acid oxidase 1	F20H11.5	S	HFLYRDFSTITIPVI
O01836	ATP-dependent RNA helicase glh-3	glh-3	S	AFLLPIMSRLILEKD
O01884	Probable ubiquinone biosynthesis monooxygenase coq-6	coq-6	S	LDAGRSPSLASFKPG
O01905			S	PIARSESSFDFQTAP
O02056	60S ribosomal protein L4	rpl-4	S	RLIIWTESAFKKLDT
O02056	60S ribosomal protein L4	rpl-4	S	AVVFLRRSHLWADIE
O02086		haf-2	S	IRLDLFTSLIRQDIA
O02365	Intermediate filament protein ifa-2	ifa-2	S	SSITSRPSFNRTVTS
O02482	Transcription factor unc-37	unc-37	S	PNLLRQASAAGGFNF
O16259	Stress-induced-phosphoprotein 1	sti-1	S	AVQWFHRSLSEFRDP
O16259	Stress-induced-phosphoprotein 1	sti-1	S	QWFHRSLSEFRDPEL
O16331		catp-3	S	QVIRRTNSQDWAVIT
O16368	Probable 26S protease regulatory subunit 4	rpt-2	S	KAVANQTSATFLRIV
O17071	Probable 26S protease regulatory subunit 10B	rpt-4	S	IGLPNEQSRLEILKI
O17352		aagr-4	S	RPFVLSRSFFAGSQR
O17526			S	IIHREIGSVAPQFTR
O17626			S	LGLGRIGSEVAVRLQ
O17732	Pyruvate carboxylase 1	pyc-1	S	LNVLRQPSFLDASVD
O17732	Pyruvate carboxylase 1	pyc-1	S	QPSFLDASVDTYFID
O17732	Pyruvate carboxylase 1	pyc-1	S	VEEAFRRSYSEAQAA
O17732	Pyruvate carboxylase 1	pyc-1	S	EAFRRSYSEAQAAFG
O17732	Pyruvate carboxylase 1	pyc-1;pyc-1	S	KYSAYWESTRQLYAP
O17892			S	ARLISGNSELAIELK
O17919	Putative H/ACA ribonucleoprotein complex subunit 4	K01G5.5	S	DIKNYISSGFFNLDK
P52275	Tubulin beta-2 chain	tbb-1;ben-1;tbb-2	S	EFPDRIMSSFSVVPS
O17953	Dihydrolipoyl dehydrogenase, mitochondrial	dld-1	S	YTEGLGLSNVQIDLD
O18215			S	VIFARNDSQLISADS
O44476	Ribonuclease Z	hoe-1	S	YWMRRGASFNEEPIV
O44549		acdh-3	S	GTIYEGTSNIQLNTI
O44552	M-phase inducer phosphatase cdc-25.1	cdc-25.1	S	SVIRRNNSSLNMLSR
O44897		haf-9	S	RSPSQSVSQSFLGTS
O44985		teg-4	S	AARGKWASAISLISA
O45080		ceh-48	S	KKTRLVFSDIQRRTL
O45148		dlst-1	S	PVLRNVESMNYAQIE
O45430		mccc-1	S	AGVFQNLSFFRMNLS
U4PC51	2-oxoglutarate dehydrogenase, mitochondrial	T22B11.5	S	FVQPRINSLLSIDGR
O61707		taf-4	S	HLLVNQDSRFTGTFI
Q86S24		unc-23;unc-23;unc-23	S	KKLQRNQSVVDFNAK
P02566	Myosin-4	unc-54	S	PGLQSSASAAVIRSP
P02566	Myosin-4	unc-54	S	VSMLYRESLNNLMTM
P02566	Myosin-4	unc-54	S	TILTGFQSQIRWHLG
P17331	Glyceraldehyde-3-phosphate dehydrogenase 4;Glyceraldehyde-3-phosphate dehydrogenase 1	gpd-4;gpd-1	S	RVPTPDVSVVDLTVR
P06125	Vitellogenin-5;Vitellogenin-3	vit-5;vit-3	S	HTPLRFESTVELKKN
P06125	Vitellogenin-5	vit-5	S	PQSEYTFSRIFDLIK
P55155	Vitellogenin-5;Vitellogenin-1;Vitellogenin-3	vit-5;vit-1;vit-3	S	NNQVVRQSAWLAAGS
P55155	Vitellogenin-5;Vitellogenin-1;Vitellogenin-3	vit-5;vit-1;vit-3	S	SAWLAAGSVVRGFAS
P06125	Vitellogenin-5;Vitellogenin-3	vit-5;vit-3	S	LRSRRVQSGIQMLQE
P06125	Vitellogenin-5	vit-5	S	VLPTIARSAMFQQTW
P06125	Vitellogenin-5;Vitellogenin-3	vit-5;vit-3	S	LTFLTNDSKFELHRA
P06125	Vitellogenin-5;Vitellogenin-3	vit-5;vit-3	S	PRVQQTDSQNAHAVF
P06125	Vitellogenin-5;Vitellogenin-3	vit-5;vit-3	S	RRVVLQLSVEPLSRQ
P06125	Vitellogenin-5;Vitellogenin-3	vit-5;vit-3	S	QLSVEPLSRQYMNMT
Q6A8K1	Actin-4;Actin-2	act-4;act-4;act-2;act-4	S	ILTERGYSFTTTAER
P10567	Paramyosin	unc-15	S	GRADQAESSLHLIRA
P10567	Paramyosin	unc-15	S	QKRQLAESESVTMQN
P10567	Paramyosin	unc-15	S	RQLAESESVTMQNLQ
P10567	Paramyosin	unc-15	S	MSLYRSPSAALLKSP
P10567	Paramyosin	unc-15	S	GAPFGSMSVADLGSL
P11141	Heat shock 70 kDa protein F, mitochondrial	hsp-6	S	NKLLGQFSLVGIPPA
P17330	Glyceraldehyde-3-phosphate dehydrogenase 3;Glyceraldehyde-3-phosphate dehydrogenase 2	gpd-3;gpd-2	S	RVPTPDVSVVDLTAR
P18948	Vitellogenin-6	vit-6	S	QGISRLQSQVTLQWT
P18948	Vitellogenin-6	vit-6	S	RITRRQSSEQDPHAF
P18948	Vitellogenin-6	vit-6	S	KIAEQLRSIYFNTLA
P18948	Vitellogenin-6	vit-6	S	INSVELRSQHLFAPI
P18948	Vitellogenin-6	vit-6	S	QAGPRVASTHVLSLR
P19626	Myosin regulatory light chain 2;Myosin regulatory light chain 1	mlc-2;mlc-1	S	SSKKRSGSEAAQFDQ
P29691	Elongation factor 2	eef-2	S	KRNIRNMSVIAHVDH
P32740	ATP-dependent (S)-NAD(P)H-hydrate dehydratase	R107.2	S	EKFPRQMSATVLTPN
P34327	Uncharacterized protein C13G5.2	C13G5.2	S	AALSRNASHYVISTV
P34343	Nuclear pore complex protein 15	npp-15	S	HGFRRRLSSIMFGGE
P34369	Pre-mRNA-splicing factor 8 homolog	prp-8	S	EWRVRAISSTNLHLR
P34437	Putative zinc finger protein F44E2.7	F44E2.7	S	AAVARRMSTFEVGES
P34575	Probable citrate synthase, mitochondrial	cts-1	S	RNLYRDGSAVSVIDP
P34689	ATP-dependent RNA helicase glh-1;ATP-dependent RNA helicase glh-2	glh-1;glh-2	S	LRQFRNGSKPVLIAT
P34712	Multidrug resistance protein pgp-1	pgp-1	S	EGLSRQASEMDDIMN
P34712	Multidrug resistance protein pgp-1	pgp-1	S	QSLRTLDSFSLAPED
P37806	Protein unc-87	unc-87	S	QTDGIIPSQAGWNKG
P41932	14-3-3-like protein 1;14-3-3-like protein 2	par-5;ftt-2;ftt-2	S	RSSWRVISSIEQKTE
P42083	Putative tyrosine-protein phosphatase B0280.11	B0280.11	S	IALRRAESQMELSGN
P45969	Uncharacterized protein T09A5.9	T09A5.9	S	SGVERLESLNDFWAN
P46561	ATP synthase subunit beta, mitochondrial	atp-2	S	RKIQRFLSQPFQVAE
P46562	Putative aldehyde dehydrogenase family 7 member A1 homolog	alh-9	S	RLLSSGMSAATLQTR
P46562	Putative aldehyde dehydrogenase family 7 member A1 homolog	alh-9	S	TLQTRMASQLLINDS
P48156	40S ribosomal protein S8	rps-8	S	RLLARISSSPGQVGQ
P48156	40S ribosomal protein S8	rps-8	S	YRALRLDSGNFSWAS
P49197	40S ribosomal protein S21	rps-21	S	AIRRMGESDDAILRL
P49405	60S ribosomal protein L5	rpl-5	S	GGINVPHSESRFFGF
P49405	60S ribosomal protein L5	rpl-5	S	INVPHSESRFFGFDQ
P51403	40S ribosomal protein S2	rps-2	S	AALQRTYSYLTPDLW
P51559	Endoprotease bli-4	bli-4	S	KLTLFSPSGTRSVLL
P51875	Guanine nucleotide-binding protein G(o) subunit alpha	goa-1	S	VAILRAMSNLGVSFG
P52015	Peptidyl-prolyl cis-trans isomerase 3;Peptidyl-prolyl cis-trans isomerase 7	cyn-3;cyn-7	S	AGPNTNGSQFFLCTV
P52713	Probable methylmalonate-semialdehyde dehydrogenase [acylating], mitochondrial	alh-8	S	SFTGSRGSFLGDLNF
P52899	Probable pyruvate dehydrogenase E1 component subunit alpha, mitochondrial	T05H10.6;pdha-1	S	QVIRRMESAAGNLYK
P53014	Myosin, essential light chain	mlc-3	S	LALGERLSADEADEL
P54002	Putative glycosyltransferase C14A4.3	C14A4.3	S	KEWHRFPSSFFIPQT
P54688	Branched-chain-amino-acid aminotransferase, cytosolic	bcat-1	S	LPGVTRDSLLELGRE
P54812	Transitional endoplasmic reticulum ATPase homolog 1;Transitional endoplasmic reticulum ATPase homolog 2	cdc-48.1;cdc-48.2	S	IPLPDEASRHQILKA
P54812	Transitional endoplasmic reticulum ATPase homolog 2	cdc-48.2	S	LGDVVSISSAQLEYG
P91128	60S ribosomal protein L13	rpl-13	S	TRLGRGFSLQELKAA
P91175			S	PIFERAISELPEDKS
P91349	Spindle-defective protein 5	spd-5	S	GQPRRSMSQPVLNVE
P91353	Probable 39S ribosomal protein L24, mitochondrial	mrpl-24	S	KYFSAQLSNQYFNLR
P91374	60S ribosomal protein L15	rpl-15	S	GSLRVLNSYWVAEDS
P91871		fasn-1	S	LKINRFRSAFDMSAN
P98080	Cytochrome b-c1 complex subunit 1, mitochondrial	ucr-1	S	SAVGGGVSNVSSLAD
P98080	Cytochrome b-c1 complex subunit 1, mitochondrial	ucr-1	S	TGNLRQLSELEAQIQ
Q05036	Uncharacterized protein C30C11.4	C30C11.4	S	FLDIGHSSTQASLVA
V6CM34	Raf homolog serine/threonine-protein kinase	lin-45	S	PKLTRSQSAPNVLHL
Q09237	Uncharacterized protein C18H9.2	C18H9.2	S	PAWARSESWIQRTQQ
Q09259	Uncharacterized protein C30G12.6	C30G12.6	S	AIIVRLASDVSLLSF
Q09390	High mobility group protein 1.2	hmg-1.2	S	HAPKRALSAFFFYSQ
Q09475	Uncharacterized helicase C28H8.3	C28H8.3	S	DVLTRSMSVVLLHSI
Q09475	Uncharacterized helicase C28H8.3	C28H8.3	S	INYGERYSELELSIL
Q09510	Probable myosin regulatory light chain	mlc-4	S	QRPQRATSNVFAMFD
Q09533	60S ribosomal protein L10	rpl-10	S	RAEGRLRSDGVGVQL
Q09652	Glutathione S-transferase kappa 1	gstk-1	S	PAMLPARSIMMMTDL
Q09657			S	VPFLTQGSGVVTTRA
Q0G819	Serine/threonine-protein phosphatase	tax-6	S	FSVLRHESESVLQLK
Q10006	Uncharacterized protein T15H9.2	T15H9.2	S	SQLSRLDSSVAILKS
Q10010	Uncharacterized protein T19C3.4	T19C3.4	S	NQLQRSYSANDVGSE
Q10663	Bifunctional glyoxylate cycle protein;Isocitrate lyase;Malate synthase	gei-7	S	RRLIRAGSVVNRIPE
Q10663	Bifunctional glyoxylate cycle protein;Isocitrate lyase;Malate synthase	gei-7	S	APFMRNYSLEVIKAC
Q10929		abi-1	S	APISRATSSISGSSP
Q17489		unc-44	S	KQFERTRSASLAAAL
Q17574	Putative methionine synthase reductase	tag-165	S	KFFATLASRFDISAD
Q17763		atp-5	S	GTFQSAVSQLPADLP
Q17832			S	LVIERASSVVTQSIS
Q17832			S	RDLQTQASREIDIPK
Q17911			S	FQTSSRNSSSQLLEQ
Q18040	Probable ornithine aminotransferase, mitochondrial	C16A3.10	S	KVVQEQASTLTLTSR
Q18074			S	MELLTSPSFHHISPL
Q18074			S	AAMRRSNSFSGVTRS
Q18211	Regulator of chromosome condensation	ran-3	S	TYDLFAPSIIGDRVL
Q18485			S	RLQRGLLSTMWLDID
Q18493	Probable UDP-N-acetylglucosamine pyrophosphorylase	C36A4.4	S	SKLFHQISTLNLSEA
Q18665			S	EKIRRSFSSVVLPSY
Q18685	Protein unc-112	unc-112	S	APIFASQSNLDMRRR
Q18685	Protein unc-112	unc-112	S	RWLQHTRSTLDQNGI
Q18688	Heat shock protein 90	daf-21	S	IEDSAVPSSCTAEAK
Q18688	Heat shock protein 90	daf-21	S	EDSAVPSSCTAEAKI
Q18786	Probable small nuclear ribonucleoprotein Sm D2	snr-4	S	KMFLRGDSVILVVKN
Q18867		perm-5	S	TLFYRVNSINADDHQ
Q18877			S	NVLVWMASRGSYVES
Q18921		snap-1	S	RLDNWSTSLLLKVKR
Q19007		nap-1	S	TKTVKADSFFNFFEP
Q19087	Putative aspartyl aminopeptidase	F01F1.9	S	RRLSAGGSTTAFEEA
Q8T3E5		ncam-1;ncam-1;ncam-1	S	KLIPRFGSTMTIERT
Q8T3E5		ncam-1;ncam-1;ncam-1	S	MTIERTYSNQLMINR
Q19324		rpn-5	S	TEGEKRWSDLHLRVG
Q19328		tsn-1	S	VEFLSGGSRLRIYIP
Q19338	Monensin-resistant homolog 2	mon-2	S	ESLHRIVSSTDLVKW
Q19554		abcf-1	S	NFGVDMDSRIAIVGP
Q19680			S	NLLERIPSSLLEVEF
Q65ZK0	Probable arginine--tRNA ligase, cytoplasmic	rars-1;rrt-1	S	DYLRRQISLLASEGV
Q19873		wdr-46	S	LVGSSRNSFLNYVDV
Q19877	40S ribosomal protein S23	rps-23	S	IVKVANTSLIALFKG
Q19891			S	SVFESQMSWIAGGKV
Q1NZ34		npp-21;npp-21;npp-21	S	RYLRGGQSLSSLVLE
Q1ZXU8		acl-5;acl-5	S	KKPRRSSSASDLGII
Q20062			S	IDAARILSIPTIVTE
Q20140	Adenylate kinase isoenzyme 1	F38B2.4	S	KYGLTHLSSGDLLRD
Q20168	Probable coatomer subunit beta'	F38E11.5	S	HAPSRVSSILELWKA
Q20228	40S ribosomal protein S9	rps-9	S	RQVVDVPSFIVRLDS
Q20306		abcf-3	S	DKAPARASSLLYGLG
Q20306		abcf-3	S	KAPARASSLLYGLGF
Q20330		ttm-4	S	ITRPLHYSYSRDYLE
Q20363	Stress-induced protein 1	sip-1	S	PYWAQRHSMLNNFNN
Q58AA8		bcs-1;bcs-1	S	SRFYRQPSDSVLADE
Q20849		rod-1	S	RLLTRLGSILMRGGR
Q20924	Sun domain-containing protein 1	sun-1	S	TPVTRRDSQPGTITG
Q21000		myo-5	S	RGLAHSMSTTGVNMR
Q21215	Guanine nucleotide-binding protein subunit beta-2-like 1	rack-1	S	WDLNQGVSTRQFISH
Q21276	Uncharacterized NOP5 family protein K07C5.4	K07C5.4	S	RLISHAGSLTNLAKY
Q21276	Uncharacterized NOP5 family protein K07C5.4	K07C5.4	S	RFAARVSSLMEYRQQ
Q21276	Uncharacterized NOP5 family protein K07C5.4	K07C5.4	S	YGLLFHSSFIGKAGT
Q21443	Lamin-1	lmn-1	S	SLIERLRSELDTLKR
Q21752	Probable voltage-dependent anion-selective channel	R05G6.7	S	PALKLTLSTQFNLAA
Q21793		pqn-53	S	RRNVIIQSQQSRRFR
Q21926	Isoleucine--tRNA ligase, cytoplasmic	irs-1	S	DLLYHVRSALDLWNG
Q21930	60S ribosomal protein L28	rpl-28	S	WQVIRNNSAFLRTQR
Q86LS6			S	GNSPHSRSSLFLQHP
Q86LS6			S	NSPHSRSSLFLQHPV
Q21966		asp-4	S	WLNRNPDSEIGGEIT
Q22101			S	PIGAYRGSFANFGAV
Q22135			S	PLLVMRPSYLGIAKK
Q22253		rpn-9	S	APFYRVSSLYLREVG
Q22254			S	KVLLRDVSAITLHKG
Q22492	Beta-hexosaminidase A	hex-1	S	VRGIMIDSSRHFLSV
Q22508		tag-18	S	GTLTRVTSYPNLSTV
Q22531			S	ASMLRMLSDVLGADV
Q65ZK5		pars-1;pars-1	S	RAFAWQNSWGLSTRT
Q22712	Myotubularin-related protein 3	mtm-3	S	SWLLRADSVAQEITH
Q22752		dyrb-1	S	TSIRELDSSNDLTFL
Q22768			S	IDLLRQRSRPYLFSN
Q22866	Tropomyosin isoforms a/b/d/f;Tropomyosin isoforms c/e	lev-11;lev-11;lev-11	S	KALQREDSYEEQIRT
Q22968	Aminomethyltransferase	gcst-1	S	PAGRCPRSHLPLIDP
Q23192	Alpha-tubulin N-acetyltransferase 2	atat-2	S	RNRPRHDSVADLMRQ
Q23266			S	VRLNNRESHLSLEDL
Q27389	60S ribosomal protein L13a	rpl-16	S	TKSLHAPSASRFRLQ
Q27389	60S ribosomal protein L13a	rpl-16	S	SLHAPSASRFRLQPR
Q27487	Peroxisomal catalase 1	ctl-2	S	TPLLIRFSTVGGESG
Q400L6			S	SLLTRLQSFLPQMEE
Q52GY3			S	AKLQRSFSYVFNNFE
Q56VY4			S	IPIHRSASHTPSMLV
Q9N3F4		vbh-1;vbh-1;vbh-1	S	RQQIRSVSIHGDLKQ
Q9N3F4		vbh-1;vbh-1;vbh-1	S	NLFHRTDSGINFDKY
Q6A573			S	KAIDRTPSTIISDPA
Q7JLJ0			S	RQFARDESHFIAPPP
Q7JLJ0			S	__MRRVFSSQAIQTA
Q7JLJ0			S	_MRRVFSSQAIQTAI
Q95QQ5			S	IGADRMSSFGDFIAL
Q7YX73			S	IENVKVISETVQLRF
Q9TZC8			S	NTLERQQSVGQQVRG
Q86NC1	Phosphorylase;Phosphorylase		S	FDRMRRMSIVEEADQ
Q86NC1	Phosphorylase;Phosphorylase		S	WLLLSNPSLADLIVE
Q8IA50	Malate dehydrogenase	mdh-1;mdh-1	S	WKIVQGLSFDDFAKG
Q8MXR6		sqd-1;sqd-1	S	GGLPSDYSEQDLRSH
Q8WQA8		rps-20	S	EVLRQITSISIEPGV
Q8WTL6		hpo-29	S	LQILRDLSLLQIHIR
Q93344		gska-3	S	RGIARTESNHQMEIV
Q93425	Putative 28S ribosomal protein S5, mitochondrial	mrps-5	S	HPMERGFSGTQLVGQ
Q93654		gras-1	S	RHLIRINSSTSVGTP
Q94010			S	KMLRHVESSGNMLSN
Q94010			S	RKISRKLSDSVMSIA
Q94361	E3 SUMO-protein ligase gei-17	gei-17	S	HDLQSIISQLSLRKP
Q95QA6		pat-12	S	VSSFRRGSQQQVSPF
Q95QL2		mrpl-13	S	VNQWLQFSRQWHVID
Q95QL3			S	KSVRRIFSDFGTISS
Q95R11			S	YFSMRDMSTISLFDK
Q95X44		vha-8	S	FGPNPNRSFFD____
Q95XJ0			S	LQRLYANSILLSGNE
Q95XJ0			S	YANSILLSGNEIGRA
Q95XP9	Protein zwilch homolog	zwl-1	S	VQARVLTSLELQPSL
Q95XR0			S	PIFSRIDSLFAEKNQ
Q95YA9	Adenylyl cyclase-associated protein	cas-1	S	RRPIRSESNSTLFDN
Q965N3			S	NFLRRELSQSDNEIL
Q9BI40	Glutamyl-tRNA(Gln) amidotransferase subunit C, mitochondrial	Y66D12A.7	S	LSLVRFDSEQAVANL
Q9BKU3			S	MILLSELSRRRIRSV
Q9BKU3			S	IRVGRSESVVVIRVD
Q9BL33			S	DRSGRSFSQVLLPWY
Q9BL81			S	QKFGRIDSLINSAGI
Q9BPN6		mrpl-15	S	LQIVEQASRIRIQDA
Q9BPN9			S	IPIQNRVSFVNAMPV
Q9GPA0		uggt-1	S	QYSPRVQSFQQIAVE
Q9GRZ0		ebp-3;ebp-1	S	TCAPPVRSASTVAAA
W6RRU8		ntl-4	S	PGLARFNSDDDLGFD
Q9GZH4		ribo-1	S	DARNRADSVLASI__
Q9N3Z0			S	RRYERTPSYSTIPRD
Q9N4G9	Probable small nuclear ribonucleoprotein G	snr-7	S	MTVIRGNSVVIMEPK
Q9N4U5		smu-2	S	HDLPRAESAQSIQAN
Q9N566			S	MKMVARKSASEEQLK
Q9N566			S	MVARKSASEEQLKNA
Q9N585		ppw-2	S	EDIGRRTSDSNIESV
Q9NAA5	Cap-specific mRNA (nucleoside-2'-O-)-methyltransferase 1	Y53F4B.13	S	NPYETIGSAFFQNRA
V6CLW7	Dystrophin-1	dys-1	S	HNLSHLLSRLNMSWT
Q9TXQ1	Poly(ADP-ribose) polymerase pme-5	pme-5	S	VHHGRQSSALTLIQA
Q9TXQ1	Poly(ADP-ribose) polymerase pme-5	pme-5	S	ARTRSGNSALHLAVL
Q9TYY8	Ubiquitin carboxyl-terminal hydrolase		S	NRIKLVRSASLPMIY
Q9TYY8	Ubiquitin carboxyl-terminal hydrolase		S	IKLVRSASLPMIYSL
Q9TZL8	6-phosphofructokinase	pfk-1	S	RALRRFDSIVPTAGR
Q9U1W1		tfg-1	S	QRLLALPSDANFVLK
Q9U2A8	60S ribosomal protein L37a	rpl-43	S	KLEVAQHSRYTCSFC
Q9U2D6		cnp-2	S	YPIVRVPSAQFTDVM
Q9U2G0	Putative U5 small nuclear ribonucleoprotein 200 kDa helicase	Y46G5A.4	S	QYEYRQNSNLVLSVD
Q9U2M1	Condensin complex subunit 1	dpy-28	S	SSLSRRASTYENWEN
Q9U354		vps-25	S	QKLNRRLSTDGVNTV
Q9U3Q0		mrps-22	S	RTSIQQRSHFALMTE
Q9UB28		let-805;let-805;let-805	S	SRNRRSLSASALAAN
Q9UB28		let-805	S	GSPRRYASQTLLDGS
Q9XU15			S	TTLRRMMSHLSDNMD
Q9XUG9		nkb-2	S	KKLITQQSTASIQSV
Q9XUV0	Proteasome subunit beta type	pbs-5	S	GYRGQGLSVGSMVAG
Q9XVF7	60S ribosomal protein L8	rpl-8	S	RGVIARASGNYATVI
Q9XVL7		letm-1;letm-1	S	RSLCRLMSINSLGSP
Q9XVP0	40S ribosomal protein S15	rps-15	S	LDQLLDMSREQFTKL
Q9XVP0	40S ribosomal protein S15	rps-15	S	PGIGATHSSRFIPLK
Q9XVP2			S	VPVTRRPSELSMGSL
Q9XW41		snx-3	S	SSVRRRYSDFEWVRA
Q9XW92	V-type proton ATPase catalytic subunit A	vha-13	S	AGRKQKFSMLQIWPV
Q9XWI6	Eukaryotic translation initiation factor 3 subunit B	eif-3.B	S	GELKKAFSTFELTGR
Q9XWJ1	Protein smg-9	smg-9	S	LRLSFQDSRWLKVSQ
Q9XWK3		npp-4	S	DVLTATQSSERIAYL
Q9XWR0		hum-9	S	STLGRQYSLTSIGSF
Q9XXD4	Putative H/ACA ribonucleoprotein complex subunit 2-like protein	Y48A6B.3	S	AVGHRRPSILIFVKP
Q9XXK1	ATP synthase subunit alpha, mitochondrial	H28O16.1	S	PAINVGLSVSRVGSA
Q9XXK1	ATP synthase subunit alpha, mitochondrial	H28O16.1	S	AVAYRQMSLLLRRPP
S6FWN4			S	LLQHSANSQLILLNL
S6FWN4			S	PKAERRASSWWRNLV
S6FWN4			S	PGFGRRVSSVEVVKN
Q7YTG2		eps-8;eps-8;eps-8;eps-8	T	PPPVRTPTMEELLRM
A0A0K3AUF2			T	TELAQSVTRIELFLA
A0A0K3AT27			T	FPFGNAQTRSFIGPN
A0A0K3ASN4		fln-2;fln-2;fln-2	T	PLSARSPTSPTLLQH
Q8IG31		prdx-2;prdx-2	T	SQNLRQITINDLPVG
A0A0S4XR45		ulp-2	T	KSLARNLTFILKPWN
O62332		imb-2	T	KQLCRSLTLLLDTHI
Q95Y95			T	PPPPARRTSQITAAT
A0A1T5HUJ2		cdk-2	T	TQNRPSVTDLMKDIR
A0A1X7RBK2	Homeobox protein ceh-38	ceh-38	T	WVAQPLATRLAILDM
A0A1X7RBT0		dve-1	T	TQVQRFNTLYEIPRL
A3QMC5		rpl-34	T	RRRLSYNTTSNKKRL
A4F325			T	NPQARQQTALFLSRF
A5Z2T7	Nicastrin	aph-2;aph-2	T	VNLIRRDTISQLKSS
K8ESK7			T	SRLYVTRTSSVPDLT
A7LPF3			T	RQIVALRTMINLNEP
Q9U377		unc-69;unc-69;unc-69	T	QVLELQNTLDDLSQR
S6EZK7			T	YMQLHRDTTVQTLTM
S6EZK7			T	MQLHRDTTVQTLTMQ
C6KRL2			T	RQLVALATEVPLKDV
C6S3M5	Polypeptide N-acetylgalactosaminyltransferase 4	gly-4;gly-4	T	TAPIRSPTMAGGLFA
D0IMZ7		fln-1;fln-1;fln-1;fln-1	T	QGVVRGETGTFNAFN
D0IMZ7		fln-1;fln-1;fln-1;fln-1;fln-1	T	WKIIQQNTFTRWVKN
D7SFQ6		dnj-25;dnj-25;dnj-25	T	FATRRMPTLNTFQFD
Q20629			T	RKLRRYLTNNHLNHI
G5EGE0		tat-5;tat-5;tat-5	T	EKLTRDGTRIEIRSA
G5EBR1		gdi-1;gdi-1	T	LLIHTGVTRYLEFKS
G5EBZ1			T	PTVIRTLTQIFGIKA
O62482		sorb-1;sorb-1	T	PFTARSDTELSLKRG
G5EC43		zen-4;zen-4;zen-4;zen-4	T	QPLHRVPTGTVLQSR
G5EFE6		cpt-2;cpt-2	T	TSATRAATLAILEEN
V6CIX1		drh-1	T	ENPMISKTVQYIVEQ
G5EDQ0		clh-1;clh-1	T	GHRRRSRTASEIFST
Q8I4B4		ccr-4;ccr-4;ccr-4	T	SRVHRVLTEDEIASG
G5EE96			T	RQLTYSTTRFGIYET
G5EEF4			T	AFRRQASTAGVNPVL
G5EFK4		arf-3	T	WRHYFQNTQGLIFVV
G5EFZ1			T	GRVQNDDTIIFFDYR
G8JY38	Vitellogenin-2;Vitellogenin-1	vit-2;vit-2;vit-1	T	AEFTARLTVGQLEKT
G8JY38	Vitellogenin-2	vit-2;vit-2	T	KSIVSLTTRPVVFLR
G8JY38	Vitellogenin-2;Vitellogenin-1	vit-2;vit-2;vit-1	T	VLYNTPLTTCYSLIA
G8JY38	Vitellogenin-2;Vitellogenin-1	vit-2;vit-2;vit-1	T	LYNTPLTTCYSLIAK
P49632	Ubiquitin-60S ribosomal protein L40;Ubiquitin;60S ribosomal protein L40;Polyubiquitin-A;Ubiquitin;Ubiquitin-related	ubq-2;ubq-1;ubq-1	T	YNIQKESTLHLVLRL
G8JYG1	NTF2-related export protein	nxt-1;nxt-1	T	GDSKRAFTQTLLLGV
H2KYJ5		mtch-1	T	LSLPLTVTRTLIQLG
H2KYJ5		mtch-1	T	LPLTVTRTLIQLGHE
H2KZG6		acdh-1	T	IGEIYEGTSNIQLNT
Q18930		aka-1;aka-1	T	LSLERALTQVLQVQG
O76566		unc-96;unc-96	T	RLATSSSTTNMFNAG
O76566		unc-96;unc-96	T	LATSSSTTNMFNAGS
H2KZS3			T	SRAPSRNTSFVSFLD
H2KZS3			T	VPPPRMPTATSFSSW
H2L0E1			T	AFFFRQATEGVAHVE
H2L2C8		atn-1;atn-1;atn-1;atn-1	T	TLFNTLQTRLRLSNR
Q21032	Isocitrate dehydrogenase [NADP];Isocitrate dehydrogenase [NADP]	idh-1;idh-1	T	NVPRLVNTWSKPIII
I2HA92	Ubiquitin carboxyl-terminal hydrolase;Ubiquitin carboxyl-terminal hydrolase		T	SSYGRSNTVSMFAQQ
Q8I7N6	Oxysterol-binding protein;Oxysterol-binding protein	obr-4;obr-4	T	RRLWRHVTAALLRNR
O01761	Muscle M-line assembly protein unc-89	unc-89	T	AAMIRQPTFSQPISE
O02086		haf-2	T	RIRLDLFTSLIRQDI
O02168		aakg-2	T	NGLLAQSTRHVLLSD
O02365	Intermediate filament protein ifa-2	ifa-2	T	PSFNRTVTSSSQNYG
O02640	Probable malate dehydrogenase, mitochondrial	mdh-1	T	VPRKPGMTRDDLFNT
O02640	Probable malate dehydrogenase, mitochondrial	mdh-1	T	PKRVFGVTTLDVVRS
O16331		catp-3	T	NRQVIRRTNSQDWAV
O16368	Probable 26S protease regulatory subunit 4	rpt-2	T	RRIFQIHTSRMTLGK
O16580	Putative glucosylceramidase 1	gba-1	T	TLPHRAITTLYIQTS
O16580	Putative glucosylceramidase 1	gba-1	T	LPHRAITTLYIQTSQ
O17732	Pyruvate carboxylase 1	pyc-1;pyc-1	T	FMVQNNLTRETLVDR
O17891			T	PKLNSISTLYNIGLM
P52275	Tubulin beta-2 chain	tbb-1;ben-1;tbb-2	T	AQAYRALTVAELTQQ
P52275	Tubulin beta-2 chain	tbb-1;ben-1;tbb-2	T	ALTVAELTQQMFDAK
O17966	DNA topoisomerase 1	top-1	T	MRVRQRATALYFIDK
O18693		acs-2	T	PSVHRQHTNSYIHGT
O44503			T	TIGIRRETVNSWERR
O44549		acdh-3	T	MQHQIGQTRMEIEAA
O45430		mccc-1	T	TRISGLPTNIDFVRR
O45815		act-5	T	ILTERGYTFTTTAER
Q6A8K1	Actin-4;Actin-2	act-5;act-4;act-4;act-2;act-4	T	MEKIWHHTFYNELRI
O46009			T	FQQDQVYTRIAFDSN
U4PC51	2-oxoglutarate dehydrogenase, mitochondrial	T22B11.5	T	HLLRRQVTMPFRKPA
O61955	Eukaryotic translation initiation factor 4E-3	ife-3	T	SLWTRDATRDDVNLR
O62173			T	NPLNRSITGIDVVKQ
O62213		cey-1	T	GFINRTDTNEDIFVH
O62477			T	TWQTRNNTSGAFTLE
O62479	Spindle assembly abnormal protein 6	sas-6	T	RTPFRDNTTLNFQNS
O76367			T	FANYDPYTRMKEICA
Q2V4T0			T	AAMRRGITRLDLAID
P06125	Vitellogenin-5;Vitellogenin-3	vit-5;vit-3	T	EAERRIPTTIGMPLT
P06125	Vitellogenin-5	vit-5	T	LTPQSEYTFSRIFDL
P10567	Paramyosin	unc-15	T	LAESESVTMQNLQRV
P18948	Vitellogenin-6	vit-6	T	HQLVSAFTLNTMELI
P18948	Vitellogenin-6	vit-6	T	SRLQSQVTLQWTDGN
P18948	Vitellogenin-6	vit-6	T	NTLALAGTRVTIQQF
P29691	Elongation factor 2	eef-2	T	KWLPAGDTMLQMIAF
P34574	Probable clathrin heavy chain 1	chc-1	T	QGIIYLVTKQGYVHL
P34662	60S ribosomal protein L35	rpl-35	T	KNIARLLTVINQTQK
P34662	60S ribosomal protein L35	rpl-35	T	RAIRRRLTAHELSLR
P41937	Tubulin beta-4 chain	tbb-4	T	SQQYRSLTVPELTQQ
P46502	Probable 26S protease regulatory subunit 6B	rpt-3	T	MATNRQDTLDPALLR
P47991	60S ribosomal protein L6	rpl-6	T	FLFGYLGTRFSLGKN
P48152	40S ribosomal protein S3	rps-3	T	VIIMATRTQNVLGER
P48156	40S ribosomal protein S8	rps-8	T	VDTMYNATNNELVRT
P49181	60S ribosomal protein L36	rpl-36	T	RELVREITGFAPYER
P49404	Putative 39S ribosomal protein L3, mitochondrial	C26E6.6	T	HMGYEWRTVSGLEIV
P51559	Endoprotease bli-4	bli-4	T	TLFSPSGTRSVLLPP
P52015	Peptidyl-prolyl cis-trans isomerase 3;Peptidyl-prolyl cis-trans isomerase 7	cyn-3;cyn-7	T	GSQFFLCTVKTAWLD
P53013	Elongation factor 1-alpha	eft-3;eef-1a.2	T	AVRDMRQTVAVGVIK
P53013	Elongation factor 1-alpha	eft-3;eef-1a.2	T	VPVGRVETGIIKPGM
P54412	Probable elongation factor 1-gamma	F17C11.9	T	RKSIVNVTRWFRTVV
P54688	Branched-chain-amino-acid aminotransferase, cytosolic	bcat-1	T	GLILPGVTRDSLLEL
P54812	Transitional endoplasmic reticulum ATPase homolog 1;Transitional endoplasmic reticulum ATPase homolog 2	cdc-48.1;cdc-48.2	T	KFARRSVTDNDIRKY
P62784	Histone H4	his-1	T	RDNIQGITKPAIRRL
P62784	Histone H4	his-1	T	SGLIYEETRGVLKVF
Q7YTG7			T	QMLVRVMTEPQNSLL
P90862			T	ALLTRQNTRAQSEQA
P90901	Intermediate filament protein ifa-1	ifa-1	T	SELQRARTDLDQETL
P90916	Probable histone-binding protein lin-53	lin-53	T	SAVPRDNTFNPLIRL
P91303	Probable V-type proton ATPase subunit G	vha-10	T	ESKIRRDTEDQISGM
Q05036	Uncharacterized protein C30C11.4	C30C11.4	T	LDIGHSSTQASLVAF
Q09293	Maternal effect lethal protein 47	mel-47	T	KVFQSMPTRVSLCGL
Q09450	Probable succinyl-CoA:3-ketoacid coenzyme A transferase, mitochondrial	C05C10.3	T	IKAWRADTLGNIQFR
Q09508	Succinate dehydrogenase [ubiquinone] flavoprotein subunit, mitochondrial	sdha-1	T	LFPTRSHTVAAQGGI
Q09510	Probable myosin regulatory light chain	mlc-4	T	RQRPQRATSNVFAMF
Q09590	NADPH--cytochrome P450 reductase	emb-8	T	TMRLPHRTTTQVIMI
Q09590	NADPH--cytochrome P450 reductase	emb-8	T	MRLPHRTTTQVIMIG
Q09590	NADPH--cytochrome P450 reductase	emb-8	T	RLPHRTTTQVIMIGP
Q10003	Putative glycerophosphocholine phosphodiesterase GPCPD1 homolog T05H10.7	T05H10.7	T	FAMARENTIHSLNTA
Q8I711	Glycine--tRNA ligase	gars-1;grs-1	T	VTIRHAETMSQIRLE
Q10663	Bifunctional glyoxylate cycle protein;Isocitrate lyase;Malate synthase	gei-7	T	RFLHDLNTEFNPRRL
Q17334	Alcohol dehydrogenase 1	sodh-1	T	YGFDRSGTFQEYLTI
Q17390	Cullin-2	cul-2	T	SKLSRMFTDIGLSQE
Q17556			T	AYVRAYQTQYNLPIV
Q17698			T	PPFLRNATPAQLQSF
Q2XMZ9			T	YGFPRAQTTIDIAIP
Q18202			T	KPLSPQNTQTFLDVS
Q18493	Probable UDP-N-acetylglucosamine pyrophosphorylase	C36A4.4	T	KLFHQISTLNLSEAH
Q18685	Protein unc-112	unc-112	T	WLQHTRSTLDQNGIT
Q18688	Heat shock protein 90	daf-21	T	SAVPSSCTAEAKIEG
Q18823	Laminin-like protein lam-2	lam-2	T	ISLNRMNTFGDEVFK
Q18921		snap-1	T	SRLDNWSTSLLLKVK
Q18946			T	IDQYTRNTAIDLIQH
Q18983			T	SSAAQFVTQLALRAP
Q19433			T	VEKLRNVTGINLAAL
Q19555		scc-3	T	APMVRRTTTEESAEV
Q19781			T	LNLQRIDTNLYIARH
Q1NZ34		npp-21;npp-21;npp-21	T	ERLTHANTQLDVLRL
Q1ZXU8		acl-5;acl-5	T	ERLARTTTLNAMLEE
Q20430		mrpl-14	T	SMGIHRRTRLNVVDN
Q20585	26S proteasome non-ATPase regulatory subunit 6	rpn-7	T	PDLELSQTRFMLNHP
Q20780		alh-1;alh-1	T	MTIIRFDTMEELVEK
Q20938	Probable 26S proteasome regulatory subunit rpn-6.1	rpn-6.1	T	SLTGARTTANAIYVN
Q21210			T	QKFHRTPTAFAFVHA
Q21215	Guanine nucleotide-binding protein subunit beta-2-like 1	rack-1	T	DLNQGVSTRQFISHT
Q21274			T	LGISRIETQQDLDVS
Q21752	Probable voltage-dependent anion-selective channel	R05G6.7	T	ALKLTLSTQFNLAAN
Q86G92			T	HRLQVYITCRTAIVL
Q22235		enpl-1	T	TDTGVGMTRQDLINN
Q22352			T	QILIRHLTQHGISTI
Q22352			T	HTLNSIETRTRLFIA
Q22494	Probable V-type proton ATPase subunit H 2	vha-15	T	AVDMLNATSRLQLEA
Q22703	Transcription factor dpl-1	dpl-1	T	RRIVQMPTGLPRSYQ
Q22716		rpl-32	T	RGMRAMPTIGHGSDR
Q22716		rpl-32;rpl-32	T	GHGSDRRTRFVLPNG
Q22866	Tropomyosin isoforms a/b/d/f	lev-11;lev-11;lev-11	T	ASLNRRMTLLEEELE
Q22993		pmt-2	T	GDFKPGQTMLDIGVG
Q23050			T	FGAFRNNTVAFMQAQ
Q23312	40S ribosomal protein S7	rps-7	T	RPRSRTLTAVHDAWL
Q23315		ears-1	T	GVMRRGLTVEGLKQF
Q23451		rad-23	T	SVTFRTLTQVNFNLE
Q23624			T	RLAIMGVTRGSIEQL
Q27487	Peroxisomal catalase 1	ctl-2	T	PLLIRFSTVGGESGS
Q27527	Enolase	enol-1	T	WGKFHGATSIQLVGD
Q65XS9		dlc-5	T	FELECRRTGKCREIV
Q75MI6			T	YGIMRPLTRIRMFEA
Q95QQ5			T	WWLRQHPTVLSLPWK
Q7YX73			T	NVKVISETVQLRFGG
Q86DC6	Intermediate filament protein ifd-1	ifd-1	T	NGFSRSQTAAQDLLK
Q86NC1	Phosphorylase;Phosphorylase		T	KQIIRLITAVAEQVN
Q86S29		cct-7;cct-7	T	LPIGDVATQWFADRD
Q8IG68		lpd-2	T	EQLGRSETLDDLLSF
Q8ITV7			T	YLRGRILTSNGPIVG
Q8ITV7			T	VRLLYQMTRSSLLQP
Q8MXS8			T	QKFGRIDTLINSAGI
Q8MYM4			T	PGFGRAQTMLDVSQL
Q8WQA8		rps-20	T	AEVLRQITSISIEPG
Q93168			T	TQFVRGWTNNSIGEW
Q93169	Methylthioribose-1-phosphate isomerase	C01G10.9	T	FLISSRPTAVDLRNS
Q93413		drh-3	T	____MQPTAIRLEDY
Q93537		plp-2;plp-1	T	APMNPRQTRQQIAIP
Q93934			T	ILNAPNRTVFFGAVG
Q94216		dnj-11	T	SKLRWQATSDEIRFC
Q94261	COP9/Signalosome and eIF3 complex-shared subunit 1	cif-1	T	YQHRRFGTEQWVLLE
Q94269			T	YRGMLGTTQWENLRQ
Q95Q08		ceh-92	T	KLVRFGGTQLPIGYV
Q95QC2			T	KLSHRINTAGELIID
Q95XP6		mca-3	T	ILWVRGLTRLQTQVI
Q95XP6		mca-3	T	RGLTRLQTQVIGGER
Q95XP9	Protein zwilch homolog	zwl-1	T	NVQARVLTSLELQPS
Q95Y90	60S ribosomal protein L9	rpl-9	T	KLIESNDTVVFPEGV
U4PBN2			T	VTNLRRVTYLVLDEA
Q966C7	Transaldolase		T	DARLSFDTQASIDRA
Q9BKU4	Mitochondrial prohibitin complex protein 1	phb-1	T	YLPGNQQTLLNLQS_
Q9BLB6	Probable U2 small nuclear ribonucleoprotein A'	mog-2	T	PTFSRLNTLYLHNNR
Q9GRZ0		ebp-3;ebp-1	T	PPVRSASTVAAAAAA
Q9GZH5		rpn-1	T	RTLIRASTTSMTSVP
Q9N2W7	Probable NADH dehydrogenase [ubiquinone] 1 alpha subcomplex subunit 12	Y94H6A.8	T	MDATRVGTLVGSDNF
Q9N2Y1		pbo-1	T	AKLRFAFTMYDLNKS
Q9N3X2	40S ribosomal protein S4	rps-4	T	KALVSLPTGAGIRLS
Q9N4E2			T	NPISRMTTVDSIYKM
Q9NLD1		hrp-2	T	VNVSIANTRLFIGNI
Q9TXH9		ubxn-1	T	PPKDYSTTTLQFRLL
Q9XW62			T	RPFLRKPTDLELKKA
Q9XWC9			T	QRVAAFSTQLQIDPI
Q9XWG2			T	HGVERVATLEDLSRE
A3QMC5		rpl-34	Y	TYRRRLSYNTTSNKK
A9Z1J6	Putative NipSnap protein K02D10.1	K02D10.1	Y	STKTLEQYMKKIEKL
V6CIX1		drh-1	Y	MISKTVQYIVEQNLQ
P51403	40S ribosomal protein S2	rps-2	Y	ALQRTYSYLTPDLWK
Q6AW08		cogc-3	Y	QLIKTNLYYFKQADA
Q6AW08		cogc-3	Y	LIKTNLYYFKQADAI

## Sheet: PhosphoSites on protein
Protein	Protein names	Gene names	Amino acid	Sequence window
Q9TXJ0	Calcium/calmodulin-dependent protein kinase type 1	cmk-1	S	VFLAESKSDAGQMYA
Q86S24		unc-23	S	KKLQRNQSVVDFNAK
G5EDW1		adbp-1	T	DSLKRRNTTSSIAKK
P47991	60S ribosomal protein L6	rpl-6	T	PKLQRNGTKFALGHS
Q9XW63			S	STLERGKSAGDVIQH
Q9XW63			S	DVIQHSKSSNNLIDA
Q49HI3		tom-1	S	RKIVSRESTNSLDTS
Q20643			T	NLLIDGETICIADFG
Q20952	Adducin-related protein 2	add-2	T	PAILRRQTSDEIQKI
Q9TXJ0	Calcium/calmodulin-dependent protein kinase type 1	cmk-1	S	SKVFLAESKSDAGQM
Q9TXJ0	Calcium/calmodulin-dependent protein kinase type 1	cmk-1	S	LFKRRDGSGPAPNAT
Q9U367			S	IELKRTSSVLDATSK
Q17848	Probable type I inositol 1,4,5-trisphosphate 5-phosphatase	ipp-5	S	ENLRRTVSAIEFRRE
Q9TXU2			T	NQLQKSATIGHIDKV
Q9N3F4		vbh-1	S	NLFHRTDSGINFDKY
A0A061AD41	Proline dehydrogenase 1, mitochondrial	B0513.5	S	KELKRRISSGEFKAR
P46012	Uncharacterized protein C01G6.5	C01G6.5	S	KNMKRTASQSAIKER
Q9TXJ0	Calcium/calmodulin-dependent protein kinase type 1	cmk-1	Y	KSDAGQMYAVKCIDK
O17560		gly-20	S	SPLVRVSSQSASVLH
Q21930	60S ribosomal protein L28	rpl-28	S	RGIGKRFSTEKFNLK
P52717	Uncharacterized serine carboxypeptidase F41C3.5	F41C3.5	S	FLKNKSQSQKPLKAD
Q9Y0A1	Inositol 1,4,5-trisphosphate receptor itr-1	itr-1	S	PPLDRQQSKIGEVIE
O62173			T	NPLNRSITGIDVVKQ
O62213		cey-1	T	GFINRTDTNEDIFVH
Q20306		abcf-3	S	TTLLKMISSQQLKIP
P92199	Rho-associated protein kinase let-502	let-502	S	PVLMRMKSVDNFISR
A0A061ACN4	mRNA-decapping enzyme 2	dcap-2	T	RPMYKRLTSEELFSA
Q9N5B7		rme-1	S	KKQFRALSGFGNAFL
P18948	Vitellogenin-6	vit-6	S	KIIKKLLSNVQEKGL
P46502	Probable 26S protease regulatory subunit 6B	rpt-3	S	LVFSTVCSRMNLSDD
Q93413		drh-3	S	STITRQSSIDELNEH
Q18786	Probable small nuclear ribonucleoprotein Sm D2	snr-4	S	KMFLRGDSVILVVKN
Q9U1X0	NADPH:adrenodoxin oxidoreductase, mitochondrial		S	FKIKDWDSKLEISEI
Q17583			S	GILTKVGSQIGINSA
O44133			T	RQMKRLPTQDYADDT
Q17848	Probable type I inositol 1,4,5-trisphosphate 5-phosphatase	ipp-5	T	PSENLRRTVSAIEFR
O45079			S	GKLRKTASNASLKKH
P90847			S	INKSARLSLEEDEAP
H9G2Y4	Acetylcholine receptor subunit alpha-type des-2	des-2	S	RATQRGNSGLALISD
J7S146	Neprilysin-21	nep-21	S	KPLRHTISDVQSRLN
P48158	60S ribosomal protein L23	rpl-23	S	GRLNRLPSAGVGDMF
Q09973			S	PKLKKRRSVVLEPIH
V6CIS4		hecd-1	S	KWFKKMSSYTDVLKG
Q20748	ATPase family AAA domain-containing protein 3	atad-3	S	PSLVRETSRITPLEV
Q20928			S	KKLRKSKSDFTGEKT
G5EEM5	Zygote defective protein 9	zyg-9	S	FQMKRTNSSSSISSI
Q9TXJ0	Calcium/calmodulin-dependent protein kinase type 1	cmk-1	S	ALKGKEESLENEIKV
P41842	TPR repeat-containing protein T20B12.1	T20B12.1	T	RQVDRSCTQSELVVK
Q02331	Uncharacterized NTE family protein ZK370.4	ZK370.4	S	PDVSRAVSFTDLAAA
P34662	60S ribosomal protein L35	rpl-35	T	RAIRRRLTAHELSLR
Q19007		nap-1	S	TKTVKADSFFNFFEP
Q22758			T	ELFKRRNTFFEVDDA
O76407			S	LRNGKKLSESEKEAN
Q9TXJ0	Calcium/calmodulin-dependent protein kinase type 1	cmk-1	S	YYNQDEDSKIMISDF
P34712	Multidrug resistance protein pgp-1	pgp-1	S	EGLSRQASEMDDIMN
H9G2V3	Calcium-dependent secretion activator	unc-31	S	SRLKRRTSSGSLNKG
H2KYP8		pnk-1	S	SKLKRVDSATGSVSP
D0PV95		laf-1	T	LDLFRTGTAPILVAT
Q22629		dgn-1	S	ILLNRLPSFTCTRGE
G5ECG0		tac-1	S	EFEVRRCSNGQIISQ
P91374	60S ribosomal protein L15	rpl-15	Y	PVCKGQTYGKPKTHG
Q9NEW7		elpc-2	S	AKNGRQQSYVEIARP
G5EDV0			S	RNMIRSASEKDLSKY
Q19680			S	NLLERIPSSLLEVEF
P91184		ptr-5	S	RYVPRRDSTNSIELQ
G5EDF9		pgp-2	S	KSLDKQRSQTSLSSH
O01905			S	PPIARSESSFDFQTA
Q9TZL8	ATP-dependent 6-phosphofructokinase 1	pfk-1	S	RALRRFDSIVPTAGR
Q17693	Probable methylenetetrahydrofolate reductase	mthf-1	S	GTIKKIDSLSTMPYC
Q93425	Putative 28S ribosomal protein S5, mitochondrial	mrps-5	S	HPMERGFSGTQLVGQ
G4SCE4		nhr-119	S	ASISRKSSLSQIASH
Q22961			S	RRRSRSRSNSNRHRT
P34283	Uncharacterized protein C02F5.6	C02F5.6	S	TLMEFKRSSQIDISR
P34283	Uncharacterized protein C02F5.6	C02F5.6	S	LMEFKRSSQIDISRL
Q9XWE1		dnj-27	S	SENWKALSEDWEPYN
Q9XVP2			S	VPVTRRPSELSMGSL
Q20228	40S ribosomal protein S9	rps-9	S	SFIVRLDSQKHIDFS
G5EE13		ptr-23	S	RPLTRQPSKFHEATQ
P51403	40S ribosomal protein S2	rps-2	S	AALQRTYSYLTPDLW
Q9BL83		vps-4	S	QPVRRVQSATHFKHV
Q9N537		szy-2	S	ILKMKQDSSLEGKDG
A0A0K3ATZ5		nsy-1	S	REMLRSTSHIGGMGV
O45380	Alpha,alpha-trehalose-phosphate synthase [UDP-forming] 2	tps-2	S	KRLARYGSHTSLCSV
Q9BPN6		mrpl-15	S	LQIVEQASRIRIQDA
Q95XR0			S	STLVKAFSGVHTVKF
Q27500	Serine/threonine-protein phosphatase		S	KKLLHANSADEITRG
O01775	Serine/threonine-protein kinase nekl-2	nekl-2	S	RKTVLKLSDFGISKE
Q9GRZ0		ebp-3;ebp-1	S	APPVRSASTVAAAAA
S6FWN4		kcc-1	S	PGFGRRVSSVEVVKN
Q94045	Putative RNA polymerase II transcriptional coactivator	T13F2.2	S	_MSSSSSSEDELEKK
P50140	Chaperonin homolog Hsp-60, mitochondrial	hsp-60	T	LRGRGDQTEIEKRIE
P41988	T-complex protein 1 subunit alpha	cct-1	S	GPKSRTASSIILRGA
Q21086	Guanine nucleotide-binding protein-like 3 homolog	nst-1	S	SNIGRFNSAILNNTE
P91128	60S ribosomal protein L13	rpl-13	S	TRLGRGFSLQELKAA
Q18038		let-716	S	HPNHLPTSDSKVKLH
Q9NAL4	Mediator of RNA polymerase II transcription subunit 17	mdt-17	S	RALVTMVSDVAERVS
U4PBX2		rnp-3	S	IQYAREDSDVISRAK
G5EE67		skr-3;skr-4	S	__MSDADSQKQIKLT
P49958	Diphthamide biosynthesis protein 1	dph-1	S	TTFNKDDSSIRIDIP
Q9BKU3			S	IRVGRSESVVVIRVD
Q18040	Probable ornithine aminotransferase, mitochondrial	C16A3.10	S	KVVQEQASTLTLTSR
Q9U1S8			S	NGLYRRISEVNFVNE
Q09580	Probable GMP synthase [glutamine-hydrolyzing]	gmps-1	S	__MKRSSSMLDINED
Q17911			S	FQTSSRNSSSQLLEQ
Q20206		rps-11	T	RAFLKQPTVNLNNKA
Q17336	Pre-mRNA-splicing factor CWC22 homolog	let-858	S	KDRRRQDSDDEDRKG
O44954		sdha-2	S	DQHWRKHSIIGIDTK
Q9U277		unc-61	S	ENYNREASKLDMEIR
Q22003			S	KKYYRKTSNLLTGES
Q22003			T	KKKYYRKTSNLLTGE
Q20240			S	KKFSRSASIVEEMEN
U4PAZ9		ptrn-1	S	PPFIRTKSQMSEVTE
P49405	60S ribosomal protein L5	rpl-5	S	INVPHSESRFFGFDQ
Q9TXJ0	Calcium/calmodulin-dependent protein kinase type 1	cmk-1	S	DRIVAKGSYTEQDAS
A6ZJ66		twk-22	S	NTIGKMVSQNPVRWR
Q18801	GDP-mannose 4,6 dehydratase 1;GDP-mannose 4,6 dehydratase 2	bre-1;gmd-2	S	GIIRRSSSFNTARIE
G5EF53		swsn-4	S	NQLRAQVSAYRLLAR
Q21049	Liprin-alpha	syd-2	S	FFNKKKNSSSDLFKR
Q9TXJ0	Calcium/calmodulin-dependent protein kinase type 1	cmk-1	Y	KPENLLYYNQDEDSK
Q95ZU1		hum-2;hum-8	S	IRHRKSQSIIVSGES
P30641	Putative RNA polymerase II subunit B1 CTD phosphatase R08D7.2	R08D7.2	S	DILSRVASTFQLDSE
Q20751	Eukaryotic translation initiation factor 5A-2	iff-2	T	HDDEHFHTGDSGAAA
Q9U2A8	60S ribosomal protein L37a	rpl-43	T	EAMKRKATGIWNCAK
Q21322		rnp-2	S	IQFAREDSDVVAQEK
O76373	Cytosolic carboxypeptidase 1	ccpp-1	S	EGKDDRGSDDDDGKD
Q09475	Uncharacterized helicase C28H8.3	C28H8.3	S	DSVDRGNSALIIAPT
G5EBX3		cyl-1	S	RLHRLQQSGHDINKE
Q9GRZ2		prp-6	S	KALEQIPSSVKLWKA
Q9TVL3	Probable cyclin-dependent kinase 9	cdk-9	S	YPFIRDVSTYEKLNK
Q9TVL3	Probable cyclin-dependent kinase 9	cdk-9	T	PFIRDVSTYEKLNKI
Q9TVL3	Probable cyclin-dependent kinase 9	cdk-9	Y	KLFDQATYPFIRDVS
Q9TVL3	Probable cyclin-dependent kinase 9	cdk-9	Y	FIRDVSTYEKLNKIG
B1Q250		ugt-26	S	NMLARHGSVIVLHKK
S6FN25	Putative polypeptide N-acetylgalactosaminyltransferase 10	gly-10	S	LHMKKCDSSSDLQKW
Q17974			S	KPFITTTSAEQIKLQ
Q18212	Spliceosome RNA helicase DDX39B homolog	hel-1	T	GTKGLAITFVSDEND
P48180	Acetylcholine receptor subunit alpha-type acr-16	acr-16	S	HSLSRANSFDADCRL
Q9UAV5	Malate dehydrogenase	mdh-1	S	IEKRKLSSAMSAAKA
Q20822	Probable signal recognition particle subunit SRP68	F55C5.8	S	KLKKLKSSSFITNET
Q9XWT4			S	NRYSTSDSSDSSENE
Q1ZXU8		acl-5	S	KKPRRSSSASDLGII
Q9TXJ0	Calcium/calmodulin-dependent protein kinase type 1	cmk-1	S	VLGTGAFSKVFLAES
Q21049	Liprin-alpha	syd-2	S	TRSSPRASPQLDNMR
Q95XR0			S	PIFSRIDSLFAEKNQ
Q23326		sek-3	S	RKMLHRPSNVEMAVK
P34343	Nuclear pore complex protein 15	npp-15	S	HGFRRRLSSIMFGGE
Q22342		atg-11	S	KQSGRQQSSQDLHHV
G5EDF9		pgp-2	S	RALVRSPSVLLLDEA
Q93654		gras-1	S	RHLIRINSSTSVGTP
P34369	Pre-mRNA-splicing factor 8 homolog	prp-8	S	EWRVRAISSTNLHLR
O76337	Cell death protein 6	ced-6	S	PVVSPKNSTAGLLDG
Q19965			S	IVLRNRVSVGELEVQ
G5ED21	DNA-directed RNA polymerase	rpoa-1	T	GALPRGGTGSFDLLL
O44411	Probable nucleolar GTP-binding protein 1	T07A9.9	S	KLLKRQKSSFEYLEQ
Q8I4H7			S	SRKNTSSSLECIEKD
Q22967		peli-1	S	KVLRRRDSANGIKKC
O02639	60S ribosomal protein L19	rpl-19	S	AELLRKISQSEKVIA
Q17820	SUMO-activating enzyme subunit aos-1	aos-1	S	VKSMLRASSENKLTG
O02209		tads-1	S	KTISKSASASHIKGP
Q9XUB6		pqn-74	S	VECVRQSSFAADRKD
Q17757	Sugar transporter SWEET	swt-3	S	NALRRTISSPDLSE_
G5ECN2			S	AVALLARSGSELCMK
Q20952	Adducin-related protein 2	add-2	S	AILRRQTSDEIQKIL
G5EEM5	Zygote defective protein 9	zyg-9	S	KRTNSSSSISSIDTS
Q86B36		fars-1	T	GRVVRQATEVTDSTR
Q09299	Putative RNA-binding protein EEED8.10	EEED8.10	S	TPLSRASSTQSLASG
Q86S66	Nascent polypeptide-associated complex subunit alpha	Y65B4BR.5;icd-2	S	LKQVTGVSRVCIRKS
E1B6U0			S	_____MDSENNNTVL
H2L048			S	KEYKSDLSAAQLKVK
I2HA99		tbc-8	S	LSITRQVSSIAASVE
O44953	Probable signal peptidase complex subunit 1	C34B2.10	S	PAPLQKLSSHIDFQG
Q9BL33			T	___MADSTRVSEKEI
O16927	Signal recognition particle 14 kDa protein	F25G6.8	S	______MSAVEQHIP
H2L079			S	RKMVRANSASDIQEF
P91914	60S ribosomal protein L27	rpl-27	S	KPFLKVVSYTHLLPT
G5EDF9		pgp-2	S	IARALVRSPSVLLLD
Q95Q39	Protein male abnormal 7	mab-7	S	RRLRRVGSLLEMTVA
P52275	Tubulin beta-2 chain	tbb-1;tbb-2;ben-1	S	EFPDRIMSSFSVVPS
O02286		pck-2	S	______MSVDPNLLT
Q18709			S	LMHAIQPSRCRLYKY
Q5ZEQ4			S	PKIQRVESSESLSLL
Q0G819	Serine/threonine-protein phosphatase	tax-6	S	FSVLRHESESVLQLK
Q23381	Probable methylmalonyl-CoA mutase, mitochondrial	mmcm-1	S	LRTHSQTSGWSLTEQ
Q93572	60S acidic ribosomal protein P0	rpa-0	S	GHLGKNPSLEKLLPH
G5EFV2			S	AQLSRQNSEEAMSLK
Q11067	Probable protein disulfide-isomerase A6	tag-320	T	LSYGKGRTSSLRGDG
V6CLR8	Dystrophin-1	dys-1	S	AALTRTVSECEDFEK
O02482	Transcription factor unc-37	unc-37	S	PNLLRQASAAGGFNF
O17742			S	CRICRLPSSANLPNL
Q22562			T	IPATRKATCECITEA
H2FLG6			T	NRLRRQDTEEQHRLE
B3CJ34		gcn-1	S	MSDDEIKSEHVQEKT
H2FLH2	Twitchin	unc-22	S	SIDMRRESVQEILEK
Q20077		pifk-1	S	PRIKKSQSESVLLKN
Q95Y04	40S ribosomal protein S28	rps-28	S	KVIGRTGSQGQCTQV
Q95PY9			S	KNLKTAESFNELPAA
G5EE73			S	RFTYRMGSSLGVVKL
P18948	Vitellogenin-6	vit-6	S	QGISRLQSQVTLQWT
Q3S1I8	Pyruvate kinase	pyk-1	T	GRLARRMTIEEEHAG
Q09533	60S ribosomal protein L10	rpl-10	S	TRINKMLSCAGADRL
Q23336		ugt-5	S	QMLERHGSVEVLSKH
P54889	Probable delta-1-pyrroline-5-carboxylate synthase;Glutamate 5-kinase;Gamma-glutamyl phosphate reductase	alh-13	S	HFLKHVDSACAFHNA
P91497		spch-3;spch-2	S	SRRNSVRSISTHTAK
Q10124	Putative RNA exonuclease pqe-1	pqe-1	S	DTFRKRYSCCNEEFN
A3FPJ7			S	KVVITQPSSNDLMPR
G5EBP5			S	ITGLFKKSPSHLDYP
G5EBP5			S	GLFKKSPSHLDYPVS
Q20774		dnj-13	S	PKFKREGSDIKRVEK
Q9TXJ0	Calcium/calmodulin-dependent protein kinase type 1	cmk-1	T	NIVQLFDTYDEKQFV
Q09396			S	STKIFDDSSENLDDD
Q21096			S	MEFCKCDSETDFAAK
Q8I111	Pyruvate dehydrogenase E1 component subunit alpha;Probable pyruvate dehydrogenase E1 component subunit alpha, mitochondrial	pdha-1;T05H10.6	S	QVIRRMESAAGNLYK
Q21657	Molybdenum cofactor sulfurase	R03A10.3	S	ALLVRKDSAHLIEKT
Q27389	60S ribosomal protein L13a	rpl-16	S	SLHAPSASRFRLQPR
A0A0K3ATP5	Forkhead box protein O	daf-16	T	RTRERSNTIETTTKA
Q18846	Putative ribosomal protein S6 kinase alpha-2	rskn-2	T	RVLTKQKTLEHTMAE
Q8MQ52			T	SNGSLKRTESSLSSE
Q9TXJ0	Calcium/calmodulin-dependent protein kinase type 1	cmk-1	T	DFRDVLGTGAFSKVF
G5EC65	Anion exchange protein	abts-1	S	LSTVRSISDIGKSFS
O17270			S	PSLILSGSSPSKIPR
A0A0K3ASW2		gck-1	S	RTGVSSDSDLDEDSD
E1B6T1		glb-24	S	QSMTRSSSTYDLSYD
Q8MXR6		sqd-1	S	SGYQRNNSGFDYQQA
Q19467		git-1	S	QGFSRRDSEDRIDGG
O44130		cima-1	S	KKLSRATSLDSPPEK
O01442			S	KDLEKRASDVTLPPA
O62055			S	GRVLARKSSDFTNPK
B2MZB1	Cuticle collagen 14	col-14	T	RRLEKRDTLQDFWAR
Q18508		mel-28	S	KNMARKNSSSLPVQS
Q09444	Probable ubiquitin carboxyl-terminal hydrolase ubh-4	ubh-4	S	EIRTVHNSFSRQTLF
G4S185		anat-1	S	KSAARTDSSDGLISL
Q17832			S	TKIENEKSRDIIIPQ
G5EFI0		rin-1	S	RVIVSHDSSRHLCSS
P92199	Rho-associated protein kinase let-502	let-502	S	FATLREASPPVIPSL
Q9N3X2	40S ribosomal protein S4	rps-4	T	KALVSLPTGAGIRLS
Q20822	Probable signal recognition particle subunit SRP68	F55C5.8	S	GKLKKLKSSSFITNE
O16696		fbxa-202	S	PNSSRRDSSGSIAYK
Q10003	Putative glycerophosphocholine phosphodiesterase GPCPD1 homolog 2	T05H10.7	T	FAMARENTIHSLNTA
P06125	Vitellogenin-5;Vitellogenin-4	vit-5;vit-4	S	ESSSDYESNYDEKET
Q9TXJ0	Calcium/calmodulin-dependent protein kinase type 1	cmk-1	Y	NATIREKYDFRDVLG
G5EBP5			S	ITGLFKKSPSHLDYP
G5EBP5			S	GLFKKSPSHLDYPIS
W6RRU8		ntl-4	S	PGLARFNSDDDLGFD
K8ESM2	Carboxypeptidase		S	AHMNRRKSFASASIK
Q21276	Uncharacterized NOP5 family protein K07C5.4	K07C5.4	S	RLISHAGSLTNLAKY
O76337	Cell death protein 6	ced-6	S	IYKTFKRSVSGIVGG
Q22288	Transthyretin-like protein 15	ttr-15	S	KAGCKRVSEYLIPKE
Q9XU15	Hexokinase		S	TTLRRMMSHLSDNMD
Q95Y11			S	EKEEEEESFDEDEVS
O44565		lam-1	T	VDKVTKATIELEDKA
P23678	Kinesin-like protein unc-104	unc-104	S	FNFERQNSALGRRLS
O02365	Intermediate filament protein ifa-2	ifa-2	S	SELRQKLSDLESRNL
G5EGD0			S	PVLKSSISLDDLFNN
Q9GYM8		kqt-2	S	PMLEKQDSFDKAERK
Q18599			S	LIKISHPSQRESLDK
Q17415		eri-12	S	AELKKKVSNLEQSAQ
P47991	60S ribosomal protein L6	rpl-6	S	FLKQLPQSGLLLVTG
Q9N2N3		mrp-1	S	KHKGRSVSFGEDSKE
Q27518	Putative cytochrome P450 CYP13A2	cyp-13A2	S	WKRLRTISSQSFSNA
G5EEX7			S	KTIARQASNILGDEE
H2L2J6		pqn-27	T	KDTAGAATETDETTP
G5EET5		hpl-1	S	KRLTRGGSEYYIKWQ
Q6AHN7	Innexin;Innexin-10	inx-10	S	PQLKRSNSAPKIEER
Q94045	Putative RNA polymerase II transcriptional coactivator	T13F2.2	S	____MSSSSSSEDEL
P50880	60S ribosomal protein L3	rpl-3	T	EGKNNGSTEFDLTQK
P30429	Cell death protein 4	ced-4	S	FQKFRRSSASEMYPK
Q95YC7			S	QQPTGGNSRYGFKG_
Q18074			S	AAMRRSNSFSGVTRS
O18017	Bloom syndrome protein homolog	him-6	S	ASLQKSDSEIALNQQ
Q18813	Galectin		S	KVLTRKDSITGRNHT
G5EFK2		rict-1	S	HSKGRSRSQSTGDIH
Q9TXJ0	Calcium/calmodulin-dependent protein kinase type 1	cmk-1	Y	LKPENLLYYNQDEDS
A8DZ44			S	KPLTTRNSETQMQTL
Q966C6	60S ribosomal protein L7a	rpl-7A	S	YIRLQRQSAILQKRL
O01991	Eukaryotic elongation factor 2 kinase	efk-1	S	KRKTLNQSSTDLSAK
A4F324	Serine/threonine-protein kinase chk-2	chk-2	S	VGVRRGISSIDLADD
A8WHU4			S	CKLIKKQSENDFHDF
D5MCQ9		sup-26	S	SNFNTTPSSTNLYIR
Q22342		atg-11	S	FKLVHSKSEELIEKS
Q93235	Sodium/potassium-transporting ATPase subunit beta-1	nkb-1	S	RECGAGDSNDDLEKN
P34346	Adenylate kinase	let-754	S	FHIASGRSYHLEFKP
Q86NJ7		dhs-2	S	VFITGCDSGFGRGLA
Q86NJ7		dhs-2	T	SKRAVFITGCDSGFG
K8ERU3		hpo-27	S	NLLNRTRSNMVIEDM
Q21215	Guanine nucleotide-binding protein subunit beta-2-like 1	rack-1	S	WDLNQGVSTRQFISH
G5ECL1			S	DEEKRPNSPSGSEDK
G5EG13		dhs-12	S	PLLQKAASHVSGDSL
O76413		syx-18	S	LEELVHGSELEFSDK
Q9BL33			S	MADSTRVSEKEIERR
A0A0K3AWH2		unc-75	S	DTDSRPASPKDKMDD
G5EF88		daf-15	S	KLPRKRNSSENLSEQ
P27639	Eukaryotic initiation factor 4A	inf-1	T	DTLTEKMTENQFTVS
Q23500	Probable cytoplasmic aconitate hydratase	aco-1	T	QVICRFDTEVELTYY
Q18688	Heat shock protein 90	daf-21	S	KEIVKKHSQFIGYPI
Q9TZE4			S	SSLKKLASGELQNVP
Q22505		immt-1	S	NQLKRTASAHSEHLE
H2KYW6		esyt-2	S	YQMLRSDSQGSLNSH
Q19162		rpl-11.2	S	HRVEREESIKWFQQK
Q9TXJ0	Calcium/calmodulin-dependent protein kinase type 1	cmk-1	S	EDSKIMISDFGLSKT
O61201			S	IGIPRRASLDQFYRK
Q9XVC4			S	TTIKRTESTCTFCGL
Q9BI73			S	IKVFSGSSHPDLSTR
Q21600			S	KSISRSTSIGSLNTI
Q18038		let-716	S	NHLPTSDSKVKLHTV
Q21463		asns-2	S	ASLVHENSAHNIGDE
H2FLK8		lea-1	S	DTTKDKASDAWDTTK
O18240		rps-18	S	VTIMQNPSQYKIPNW
Q21993	Probable prefoldin subunit 5	pfd-5	S	LLTRNEKSISALDDV
O62348		apb-3	S	KPAPELISSFKERDK
D6R8W9		rbc-1	S	LMKVDFDSDVVVEKS
D6R8W9		rbc-1	S	AQIGKSPSLLDIPTS
Q17974			S	KTLSKAVSENNMVLA
G3MU88		sec-61	S	MRGHREKSMIHELNR
Q23312	40S ribosomal protein S7	rps-7	S	SEIEKQVSQALIDLE
Q9U307	Glutamine synthetase	gln-3	T	KDNERRLTGLHETAS
G5EBW7			S	______MSDEEEEDV
Q19046		rcq-5	S	ETITIDDSDEETDKE
P42083	Putative tyrosine-protein phosphatase B0280.11	B0280.11	S	IALRRAESQMELSGN
Q9TYL9	Coatomer subunit beta	copb-1	S	MLGAKSISRLDVTTE
Q18183			S	NHRKRSDSRLVLDVL
P48166	60S ribosomal protein L44	rpl-41	S	RRYDRKQSGFGGQTK
A0A061ACQ8			T	VPLLRGKTDDEIGAL
Q965S4		rga-4;rga-3	S	TSQIRRGSKEDILAQ
P34540	Kinesin heavy chain	unc-116	S	RFLPKFPSEDSISLG
O76840	Papilin	mig-6	S	KIQEARKSTNNLALK
P91500	Molybdopterin synthase catalytic subunit		S	RQRSRTDSRLTFIDV
Q9TXU2			S	NHNQLQKSATIGHID
G5EFJ0	Kinesin-like protein	klp-12	S	LRKSRTSSQSSLLRS
G5EGD0			S	GSNPRRDSHVSFETL
P91497		spch-3;spch-2	S	RSVGRPMSRRNSVRS
Q9BKU3			S	KLIRVGRSESVVVIR
Q10010	Uncharacterized protein T19C3.4	T19C3.4	S	NQLQRSYSANDVGSE
O16999	Zinc finger protein ZPR1 homolog	W03F9.1	S	ERVHRGLSQDQEKRR
P41848	FACT complex subunit SSRP1-A	hmg-4	S	EGRQRDDSDDDSTDE
Q8IFY8			S	KVPLQSVSEPKILLQ
P53013	Elongation factor 1-alpha	eft-3;eef-1a.2	Y	TTTGHLIYKCGGIDK
H2KY79	Major sperm protein	hpo-28	S	RILRRRSSTFTDPTN
Q18186			S	IGVESEESEEDEETD
Q9Y0A1	Inositol 1,4,5-trisphosphate receptor itr-1	itr-1	T	KRLNRQNTLNPGHRL
O17859			S	TRTARSSSNTSLIDT
G5EBL3		sdc-2	S	QKTVIRRSQSVCDLN
V6CLT1			S	___MRRLSSGDLNVI
Q21217	Probable 4-aminobutyrate aminotransferase, mitochondrial	gta-1	S	PDLVKVASQPHLITS
C7IVS5		pqn-80	T	DEEEEEETDVEESIQ
Q20779	Probable cytochrome c oxidase subunit 6A, mitochondrial	tag-174	S	VKTFQRKSSGSFYGS
P91500	Molybdopterin synthase catalytic subunit		T	RARQRSRTDSRLTFI
P91398		cey-3	S	TASPDSKSCTKIISE
Q9U229		wah-1	S	NAIGKCDSSLETVSV
O01496			T	LSVSRSQTSVDMNEK
Q9NAH3		teg-1	S	_MPKRAVSFADDIET
P05690	Vitellogenin-2;Vitellogenin-1	vit-2;vit-1	S	VRIFRTTSTSQLKEI
Q27389	60S ribosomal protein L13a	rpl-16	T	VPAKYQKTKSLHAPS
P92160		tag-163	S	SEESSDLSDAEEKDD
Q45FX5	Protein vav-1	vav-1	S	VSQSRTTSMIGLSPI
Q9N3X2	40S ribosomal protein S4	rps-4	S	HSFATRISNVFVIGK
O02141			S	KRLARAASFTNLTYI
Q09248	Probable dynactin subunit 2	dnc-2	S	GKEDIYESDGAASQV
A3QMC5		rpl-34	S	VTYRRRLSYNTTSNK
G5ECG7		dsc-4	S	FCLRTSNSNVDINQK
Q9TXQ1	Poly(ADP-ribose) polymerase pme-5	pme-5	S	SDFDQNSSGTEAEKF
Q19300		farl-11	S	SRSSRNASLADLSDS
Q18034	Transcriptional repressor NF-X1 homolog	nfx-1	S	GILKRSTSFSQLNCM
O17328		mct-6	S	SLLERSMSQSSGVQK
G5EEL2		plrg-1	S	LNMFASASPDNIKQW
Q22037	Heterogeneous nuclear ribonucleoprotein A1	hrp-1	S	GLSKDEMSKAQMNRD
Q94300	60S ribosomal protein L11	rpl-11.1	T	______MTDVEKQTE
G8JY94	Intermediate filament protein ifc-2	ifc-2	S	GVQAHRGSVSSLITD
Q9U329			S	IRFRKEDSVIAPIRA
Q18990		pyr-1	T	EMVGKRPTMNSLVDC
Q7JL40	Pyruvate kinase	pyk-1	S	___MSDDSFQKELEA
H2L023	Adenylyl cyclase-associated protein	cas-1	S	GASQGGSSPAKPAAP
P54889	Probable delta-1-pyrroline-5-carboxylate synthase;Glutamate 5-kinase;Gamma-glutamyl phosphate reductase	alh-13	S	LIIPRGSSDLVRSMQ
O02639	60S ribosomal protein L19	rpl-19	S	RLQKRLASAVLKCGK
P46561	ATP synthase subunit beta, mitochondrial	atp-2	S	TQAGSEVSALLGRIP
P91871		fasn-1	T	GKLEDIRTSEIADRI
Q9N4J8	T-complex protein 1 subunit gamma	cct-3	S	LEYKKGESQTSLEIM
P52275	Tubulin beta-2 chain	tbb-1;tbb-2	S	QCGNQIGSKFWEVIS
Q94010			S	RKISRKLSDSVMSIA
P90762		rmd-2	S	KSLSRSLSQTTAHSK
Q93714	Probable isocitrate dehydrogenase [NAD] subunit alpha, mitochondrial	idha-1	S	KGAAVFESVHGTAPD
P48166	60S ribosomal protein L44	rpl-41	S	ELGGQKKSRGQVIQF
H2L0N0		unc-132	S	GTTAAPMSTTVPHDR
O44787		usp-39	S	MTNEEPKSPEKVERR
O62332		imb-2	S	KANDEDSSVPDREED
Q95ZU1		hum-2	S	PGILQHESSSDLMTA
P50880	60S ribosomal protein L3	rpl-3	S	CIGAWHPSRVAFTVA
P46769	40S ribosomal protein SA	rps-0	T	GAAHSALTEEDVMKL
Q9TYN2	tRNA-dihydrouridine(47) synthase [NAD(P)(+)]		S	YGLDHWGSDDAGVER
G5ED40		cua-1	S	VKYSKEGSSDHLEKC
Q19246		dhs-25	S	TAKALPASQSHSSFA
Q17490		unc-44	S	NETMFSESEDEGQAA
P46580	Protein arginine N-methyltransferase 5	prmt-5	S	NSPSRSISSVEAANS
O44952	Lon protease homolog, mitochondrial	C34B2.6	T	QCMKKVKTENPLVLI
Q93576	Nucleoside diphosphate kinase	ndk-1	S	ALKQMTASKAHLEVH
P51404	40S ribosomal protein S13	rps-13	S	SAIPYRRSVPSWQKM
G5EC98	CTP synthase	ctps-1	S	KIADAYASVNKALSH
P48154	40S ribosomal protein S3a	rps-1	S	SKIRKIRSEMIGCIE
G5EFK2		rict-1	S	FNQRLWNSEKYLYKT
Q23621	Glutamate dehydrogenase	gdh-1	S	AEELKSNSLSQKDKK
Q8IA76	Phosphoinositide phospholipase C	pll-1	S	LDNPDTDSGEVSEED
O61955	Eukaryotic translation initiation factor 4E-3	ife-3	S	____MSTSVAENKAL
Q19086		dpf-4	S	SGPKRASSVISIDLA
P55155	Vitellogenin-1	vit-1	S	LLNEASGSVCKVQKN
O01498	Signal transducing adapter molecule 1	stam-1	S	YPSAKASSPAVQTNS
P91230			S	KCISKSCSYNDLERL
G5EF96		unc-40	S	PSHFNEDSDSDDSDV
H2KYN6		smk-1	S	ETETEVESVDGGQEE
P49632	Ubiquitin-60S ribosomal protein L40;Ubiquitin;60S ribosomal protein L40	ubq-2	S	KKKCGHSSELRIKKK
P51403	40S ribosomal protein S2	rps-2	T	LIPAPRGTGIVSAPV
Q09474	Tryptophan 2,3-dioxygenase	tdo-2	S	PRMVKTLSEHSNLSH
Q9TXJ0	Calcium/calmodulin-dependent protein kinase type 1	cmk-1	S	SYTEQDASNLIRQVL
P34635	Putative serine/threonine-protein kinase ZK507.3	ZK507.3	S	______MSNSQKPPS
Q8MNS3	Probable protein phosphatase 2C F42G9.1	F42G9.1	S	IVANAGDSRAVLCRN
Q21021		npp-9	S	DRFQKQLSDLSTNHG
G5EEP9		frm-1	S	SRIEKHASPVATPEK
Q9N533			S	APEMSSESDFEDFVR
Q23511		lars-2	S	QQIRRIGSALQWPLK
Q21618		glb-20	S	TKSMRKDSHPISAQG
P52275	Tubulin beta-2 chain	tbb-1;tbb-2;ben-1	T	AQAYRALTVAELTQQ
Q22037	Heterogeneous nuclear ribonucleoprotein A1	hrp-1	S	DDKNRSESNVSTKRL
Q9BKU2			S	CKRTCGVSTTDLVGR
Q9TXU2			S	CRIKKRESVELERQA
P46551	Cyclin-dependent kinase 12	cdk-12	S	RTRSHSGSPSRFYSK
Q86B36		fars-1	S	LVVSKGTSFTTSLAK
Q22856			S	NTLKRHFSENEIEMV
G5EDI8		drh-1	S	GLNKSTASSADISAS
Q23121	Probable splicing factor, arginine/serine-rich 1	rsp-1	S	DDSQAGRSRSRSNSR

## Sheet: Common phosphosites
Protein	Protein names	Gene names	Amino acid	Sequence window
P51403	40S ribosomal protein S2	rps-2	S	AALQRTYSYLTPDLW
Q18074			S	AAMRRSNSFSGVTRS
P52275	Tubulin beta-2 chain	tbb-1;tbb-2;ben-1	T	AQAYRALTVAELTQQ
P52275	Tubulin beta-2 chain	tbb-1;tbb-2;ben-1	S	EFPDRIMSSFSVVPS
P34712	Multidrug resistance protein pgp-1	pgp-1	S	EGLSRQASEMDDIMN
P34369	Pre-mRNA-splicing factor 8 homolog	prp-8	S	EWRVRAISSTNLHLR
Q10003	Putative glycerophosphocholine phosphodiesterase GPCPD1 homolog 2	T05H10.7	T	FAMARENTIHSLNTA
Q17911			S	FQTSSRNSSSQLLEQ
Q0G819	Serine/threonine-protein phosphatase	tax-6	S	FSVLRHESESVLQLK
O62213		cey-1	T	GFINRTDTNEDIFVH
P34343	Nuclear pore complex protein 15	npp-15	S	HGFRRRLSSIMFGGE
Q93425	Putative 28S ribosomal protein S5, mitochondrial	mrps-5	S	HPMERGFSGTQLVGQ
P42083	Putative tyrosine-protein phosphatase B0280.11	B0280.11	S	IALRRAESQMELSGN
P49405	60S ribosomal protein L5	rpl-5	S	INVPHSESRFFGFDQ
Q9BKU3			S	IRVGRSESVVVIRVD
Q9N3X2	40S ribosomal protein S4	rps-4	T	KALVSLPTGAGIRLS
Q86S24		unc-23	S	KKLQRNQSVVDFNAK
Q1ZXU8		acl-5	S	KKPRRSSSASDLGII
Q9N5B7		rme-1	S	KKQFRALSGFGNAFL
Q18786	Probable small nuclear ribonucleoprotein Sm D2	snr-4	S	KMFLRGDSVILVVKN
G5EEX7			S	KTIARQASNILGDEE
Q18040	Probable ornithine aminotransferase, mitochondrial	C16A3.10	S	KVVQEQASTLTLTSR
Q9BPN6		mrpl-15	S	LQIVEQASRIRIQDA
Q9N3F4		vbh-1	S	NLFHRTDSGINFDKY
Q19680			S	NLLERIPSSLLEVEF
O62173			T	NPLNRSITGIDVVKQ
Q10010	Uncharacterized protein T19C3.4	T19C3.4	S	NQLQRSYSANDVGSE
S6FWN4		kcc-1	S	PGFGRRVSSVEVVKN
W6RRU8		ntl-4	S	PGLARFNSDDDLGFD
Q95XR0			S	PIFSRIDSLFAEKNQ
O02482	Transcription factor unc-37	unc-37	S	PNLLRQASAAGGFNF
P18948	Vitellogenin-6	vit-6	S	QGISRLQSQVTLQWT
Q8I111	Pyruvate dehydrogenase E1 component subunit alpha;Probable pyruvate dehydrogenase E1 component subunit alpha, mitochondrial	pdha-1;T05H10.6	S	QVIRRMESAAGNLYK
P34662	60S ribosomal protein L35	rpl-35	T	RAIRRRLTAHELSLR
Q9TZL8	ATP-dependent 6-phosphofructokinase 1	pfk-1	S	RALRRFDSIVPTAGR
G5EDF9		pgp-2	S	RALVRSPSVLLLDEA
H9G2Y4	Acetylcholine receptor subunit alpha-type des-2	des-2	S	RATQRGNSGLALISD
Q93654		gras-1	S	RHLIRINSSTSVGTP
Q94010			S	RKISRKLSDSVMSIA
Q21276	Uncharacterized NOP5 family protein K07C5.4	K07C5.4	S	RLISHAGSLTNLAKY
H2FLH2	Twitchin	unc-22	S	SIDMRRESVQEILEK
Q27389	60S ribosomal protein L13a	rpl-16	S	SLHAPSASRFRLQPR
D5MCQ9		sup-26	S	SNFNTTPSSTNLYIR
Q19007		nap-1	S	TKTVKADSFFNFFEP
P91128	60S ribosomal protein L13	rpl-13	S	TRLGRGFSLQELKAA
Q9XU15	Hexokinase		S	TTLRRMMSHLSDNMD
Q9XVP2			S	VPVTRRPSELSMGSL
P05690	Vitellogenin-2;Vitellogenin-1	vit-2;vit-1	S	VRIFRTTSTSQLKEI
A3QMC5		rpl-34	S	VTYRRRLSYNTTSNK
Q21215	Guanine nucleotide-binding protein subunit beta-2-like 1	rack-1	S	WDLNQGVSTRQFISH
H2KYW6		esyt-2	S	YQMLRSDSQGSLNSH
